# Supplementary material
Source: PubMed Central journal article supplement (PMC1069643)

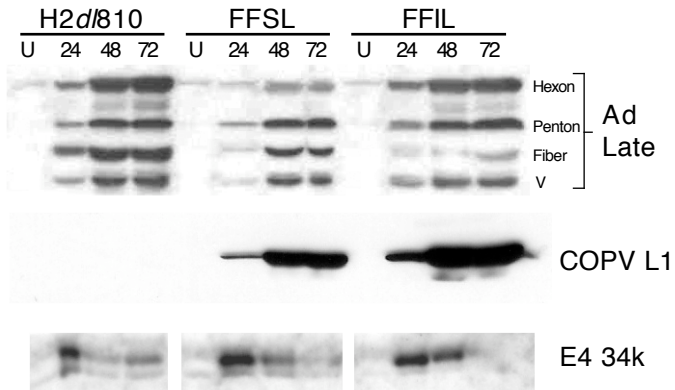

Supplement: pnas_102_12_4590__3.pdf [file pnas_102_12_4590__3.pdf]
